## Manuscript withdrawal statement

**Title:** The relationship between antibiotic use in humans and poultry and antibiotic resistance prevalence in humans: an ecological regression study of *Campylobacter* in the UK

**Authors:** Eve Emes<sup>1</sup>, Javier Guitian<sup>2</sup>, Gwenan Knight<sup>1</sup>, Nichola Naylor<sup>3</sup>

<sup>1</sup>London School of Hygiene and Tropical Medicine (LSHTM)

<sup>2</sup>Royal Veterinary College (RVC)

<sup>3</sup>UK Health Security Agency (UKHSA)

**Reason:** the authors have withdrawn this manuscript because, upon running further robustness tests, some of the results presented in the preprint were determined not to be robust. Therefore, the authors do not wish this work to be cited as reference for the project. If you have any questions, please contact the corresponding author.
